# Supplementary material
Source: publisher site journal article supplement (http://static.cambridge.org/content/id/urn:cambridge.org:id:article:S0003408814000272/resource/name/limn140016_Supplementary_description-1-olm.pdf)
Supplement: Supplementary file 1 [file limn140016_Supplementary_description-1-olm.pdf]

# Supplements for model descriptions

## Estimation of inflows

The load flowing to the box is expressed by:

$$I_j = (L_{\text{river},j} + L_{\text{piston},j} + L_{\text{exch},j}) \quad (\text{S1})$$

where  $L_{\text{river}}$  is the load from the inflowing rivers,  $L_{\text{piston}}$  is the load produced by extrusion flows from the upper boxes and  $L_{\text{exch}}$  is the load produced by exchange flows from the adjacent boxes (DSi amount in  $\text{g hour}^{-1}$ ; diatom abundance in  $\text{cm}^3 \text{hour}^{-1}$ ). The loads from groundwater input and precipitation could be negligible (Arai *et al.*, 2012). The  $L_{\text{river}}$  for DSi was calculated by the L-Q equation taken by the Kasumigaura River Office (KRO), while  $L_{\text{river}}$  for diatoms was regarded as zero.

### *DSi load from the inflowing rivers*

The hourly DSi loads from Sakura and Ono Rivers ( $L_{\text{Sakura}}$  and  $L_{\text{Ono}}$ , respectively) were estimated by the L-Q equation based on the monitoring data for six rainfall events at the stations on the rivers (site information available at: <http://www1.river.go.jp/>) taken by the KRO in 2007 as follows ( $N = 50$ ,  $r^2 = 0.94\text{--}0.98$ ):

$$L_{\text{Sakura}} = 24Q_{\text{Sakura}}^{0.88} \quad (\text{S2})$$

$$L_{\text{Ono}} = 42Q_{\text{Ono}}^{0.80} \quad (\text{S3})$$

where  $Q_{\text{Sakura}}$  and  $Q_{\text{Ono}}$  are the river discharge on Sakura and Ono Rivers, respectively ( $\text{m}^3 \text{hour}^{-1}$ ). The L-Q equation was not obtained on the other rivers. In the present study, the DSi load inflowing to the box  $j$  was estimated using the discharge ratio as the following equation:

$$L_{\text{river}, j} = \frac{Q_{\text{river}, j} (L_{\text{Sakura}} + L_{\text{Ono}})}{(Q_{\text{Sakura}} + Q_{\text{Ono}})} \quad (\text{S4})$$

Discharge from the inflowing rivers to the box  $j$ ,  $Q_{\text{river}, j}$ , was estimated by:

$$Q_{\text{river}, j} = Q_{\text{river}, t} q_j \quad (\text{S5})$$

where  $Q_{\text{river}, t}$  is the total river discharge from all influent rivers and the parameter  $q_j$  is the mean distribution ratio of discharge, which we determined using the water budgets in the lake as reported by Fukushima (1984) ( $q_1$ ,  $q_2$ ,  $q_3$ , and  $q_4$  are 0.28, 0.32, 0.17, and 0.22, respectively).  $Q_{\text{river}, t}$  was calculated based on the hourly river discharge observed on Sakura, Ono, and Koise Rivers whose catchment area of 740 km<sup>2</sup> accounts 52% of the entire catchment of the lake.  $Q_{\text{river}, t}$  was calculated by dividing the sum of the discharges ( $Q_{\text{Sakura}} + Q_{\text{Ono}} + Q_{\text{Koise}}$ ) by the catchment area ratio (0.52).

11

### 12 *Load produced by extrusion flows*

The load from the extrusion flow  $L_{\text{piston}}$  was calculated by multiplying the concentration  $C$  of the upper box by the flow rate determined on the assumption of the steady state of the water level of each box.

$$\left. \begin{aligned} \text{BOX 1 : } L_{\text{piston}, 1} &= 0 \\ \text{BOX 2 : } L_{\text{piston}, 2} &= 0 \\ \text{BOX 3 : } L_{\text{piston}, 3} &= C_1 Q_{\text{river}, 1} + C_2 Q_{\text{river}, 2} \\ \text{BOX 4 : } L_{\text{piston}, 4} &= C_1 Q_{\text{river}, 1} + C_2 Q_{\text{river}, 2} + C_3 Q_{\text{river}, 3} \end{aligned} \right\} (\text{S6})$$

20

### 21 *Load produced by exchange flows*

The exchange flow discharge  $Q_{\text{exch}}$  was determined by Fukushima (1984), based on both the mass balance of electric conductivity as a tracer and the flow simulation. Mean  $Q_{\text{exch}}$  between BOX 1 and BOX 3 ( $Q_{\text{exch}, 13}$ ), BOX 2 and BOX 3 ( $Q_{\text{exch}, 23}$ ), and BOX 3

1 and BOX 4 ( $Q_{\text{exch}, 34}$ ), were determined to be 3.0, 21.4, and 13.9  $\text{m}^3 \text{s}^{-1}$ , respectively. We  
 2 assumed that  $Q_{\text{exch}}$  is constant because the seasonal variation was not so large in the  
 3 flow simulation by Fukushima (1984) (the coefficients of variance [CV] was less than  
 4 30%).  $L_{\text{exch}}$  was calculated by the following formulas.

$$\begin{aligned}
 5 \quad & \text{BOX 1 : } L_{\text{exch}, 1} = (C_3 - C_1) Q_{\text{exch}, 13} \\
 6 \quad & \text{BOX 2 : } L_{\text{exch}, 2} = (C_3 - C_2) Q_{\text{exch}, 23} \\
 7 \quad & \text{BOX 3 : } L_{\text{exch}, 3} = (C_1 - C_3) Q_{\text{exch}, 13} + (C_2 - C_3) Q_{\text{exch}, 23} + (C_4 - C_3) Q_{\text{exch}, 34} \\
 8 \quad & \text{BOX 4 : } L_{\text{exch}, 4} = (C_3 - C_4) Q_{\text{exch}, 34}
 \end{aligned}
 \left. \vphantom{\begin{aligned} \text{BOX 1} \\ \text{BOX 2} \\ \text{BOX 3} \\ \text{BOX 4} \end{aligned}} \right\} \text{(S7)}$$

9  
 10

## 11 Equations of DSi release rate

12

13 The DSi release rate from SS is expressed using the following equation:

$$14 \quad R_{\text{SS}, j} = \frac{B_{0,j}}{1 + \gamma \cdot \text{SS}_{\text{sed}, j}} \left[ k_f \beta_{f,j} \exp(-k_f \tau_j) + k_o \beta_{o,j} \right] \exp \left[ - \left( \frac{a_1}{WT_j + 273.15} - \frac{a_1}{298.15} \right) \right] \quad \text{(S8)}$$

15 where  $B_0$  is the BSi content of resuspended sediments ( $B_{0, 1}$ ,  $B_{0, 2}$ ,  $B_{0, 3}$ , and  $B_{0, 4}$  are  
 16 0.023, 0.029, 0.041, and 0.010  $\text{g g}^{-1}$ , respectively),  $\gamma$  is a constant of  $1.2 \times 10^{-4} \text{ m}^3 \text{ g}^{-1}$ ,  $k_f$   
 17 and  $k_o$  are the dissolution rate constants of fresh diatom frustules ( $5.4 \times 10^{-2} \text{ hour}^{-1}$ ) and  
 18 old diatom frustules ( $2.1 \times 10^{-4} \text{ hour}^{-1}$ ), respectively,  $\beta_f$  and  $\beta_o$  are the ratio of the BSi  
 19 amount consisting of fresh frustules to the total BSi amount (0.024) and the ratio of the  
 20 BSi amount consisting old frustules to the total BSi amount (0.976), respectively,  $\tau$  is  
 21 the elapsed time of sediment resuspension caused by strong wind (hour),  $a_1$  is a constant  
 22 of  $4.2 \times 10^3 \text{ K}$ , and  $WT$  is the water temperature ( $^{\circ}\text{C}$ ).

23 The DSi release rate from bottom sediments was also determined by:

1 
$$R_{\text{bottom},j} = k_{\text{bottom}}[a_2 \exp(a_3 WT_j) - C_{\text{DSi},j}] \quad (\text{S9})$$

2 where  $k_{\text{bottom}}$  is the rate constant of  $2.0 \times 10^{-4} \text{ m hour}^{-1}$ ,  $a_2$  is  $4.9 \times 10^{-4} \text{ g m}^{-3}$ , and  $a_3$  is  
3  $3.6 \times 10^{-2} \text{ K}^{-1}$ .

4

5

## 6 **Estimation of input variables**

7

### 8 *SS concentration derived from the sediment resuspension*

9 The hourly  $SS_{\text{sed}}$  was estimated by the method developed by Seki *et al.* (2006) since  
10 1998, which uses the automatically monitored hourly turbidity and the chlorophyll *a*  
11 concentrations at the four sites taken by the KRO. To improve the accuracy, we used the  
12 linear regression model between those values and the monthly concentrations of SS and  
13 chlorophyll *a* taken by the manual sampling by the National Institute for Environmental  
14 Studies (NIES) for each year (the CV of the root mean squared error [RMSE] for SS:  
15 29%–38%; chlorophyll *a*: 33%–42%). We subtracted the minimum value of the SS  
16 concentrations in 2004 simulated by Seki *et al.* (2006),  $10 \text{ g m}^{-3}$ , from the estimated  
17  $SS_{\text{sed}}$  by assuming that the SS remaining in the water column (consisting mainly of clay  
18 minerals) might not attribute to the DSi release.

19

### 20 *Water temperature*

21 The hourly  $WT$  was estimated by a linear interpolation of the monthly water  
22 temperature at the depth of 0.5 m at the four sites obtained by the NIES.

23

### 24 *Solar irradiance*

25 The hourly  $IRR_0$  was estimated by the daily irradiance values at the Tsukuba Weather

1 Station taken by the Japan Meteorological Agency (JMA; <http://www.jma.go.jp/jma/>).  
 2 For estimating the hourly values, we used the hourly observed irradiance values at  
 3 Kasumigaura Water Research Station recorded by the NIES to calculate the ratio of  
 4 hourly to daily irradiance values during the years 1998–2010. Hourly *IRR* was estimated  
 5 by multiplying the JMA irradiance by this ratio (the CV of the RMSE is 42%).

6

7 *Light attenuation coefficient*

8 The monthly  $K_d$  was determined by applying Lambert-Beer’s law to the profiles of  
 9 light intensity in the water column taken at the four sites by the NIES. The hourly  $K_d$   
 10 was estimated from the hourly  $SS_{sed}$  values using the relationships between  $SS_{sed}$  and the  
 11 monthly observed  $K_d$  at three sites (except site D;  $r^2 = 0.36–0.50$ ), because the  
 12 correlation coefficient was low at site D ( $r^2 = 0.14$ ). We therefore estimated the  $K_d$  at  
 13 site D from that at site C ( $r^2 = 0.36$ ).

14

15

16 **Model calibration**

17

18 The object function *OFUNC* was calculated using the following equations:

19 
$$OFUNC = \bar{E}_{DSi} \bar{E}_{diatoms} \quad (S10)$$

20 
$$\bar{E} = \frac{\sum_j E_j V_j}{\sum_j V_j} \quad (S11)$$

21 where  $E$  is the RMSE (DSi in  $g\ m^{-3}$ , diatoms in  $cm^3\ m^{-3}$ ). We calibrated the DSi  
 22 concentrations in the four boxes using the observation data at the four sites, but since  
 23 the diatom abundances were monitored at only two sites (A and C), we calibrated the

1 parameters in BOX 1 and BOX 3.  $E_{\text{DSi}}$  was determined as the RMSE of the monthly  
2 DSi concentration, and we calculated  $E_{\text{diatoms}}$  by three different methods: (1) the RMSE  
3 of the monthly diatom abundance ( $N = 12 \text{ months} \times 6 \text{ years}$ ), (2) the RMSE of the  
4 annual maximum diatom abundance ( $N = 6$ ), and (3) the average of (2) and the RMSE  
5 of the annual minimum diatom abundance ( $N = 6$ ). We refer to the three calibration  
6 methods as CM1, CM2 and CM3, respectively.

7 As results, different shapes of diatom bloom patterns were obtained using the three  
8 calibration methods. Some model predictions by CM1 and 2 represented relatively flat  
9 peaks of diatom blooms which were different from the field observations, especially  
10 during the 2000s. In contrast, the predictions calibrated by CM3 showed sharp peaks of  
11 blooms which were similar to the field observations. We therefore used the results  
12 calibrated by CM3, as **Table 1** in the manuscript.

13
